# Supplementary material for: Assessing the well-being of residents in nursing facilities
Source: Springer Nature journal article supplement (doi:10.1007/s12662-021-00776-w), 2021-11-01
Supplement: MOESM1 [file 19819506]

**Supplementary Table S1**

*Laurens Well-Being Inventory for Gerontopsychiatry – German Version*

*van der Wolf et al., 2018 – Johnen, Klotzbier, & Schott, submitted*

Die folgenden Aussagen betreffen ihr Wohlbefinden in der **letzten** **Woche**. Der Fragebogen ermöglicht es, uns einen Eindruck davon zu verschaffen, wie Sie sich fühlen und wie Sie im Alltag zurechtkommen.

Bitte markieren Sie bei jeder Aussage die Antwort, die Ihrer Meinung nach am besten beschreibt, wie Sie sich in der **letzten** **Woche** gefühlt haben. Es gibt keine richtigen oder falschen Antworten.

| 1. Wie häufig haben Sie sich fit gefühlt? | nie | manchmal | häufig | immer |
| --- | --- | --- | --- | --- |
| 1. Wie häufig haben Sie sich entspannt gefühlt? | nie | manchmal | häufig | immer |
| 1. Ich denke, ich bin die Bemühungen anderer wert. | stimme völlig zu | stimme  eher zu | stimme  eher nicht zu | stimme überhaupt nicht zu |
| 1. Wie häufig haben Sie genügend Respekt erhalten? | nie | manchmal | häufig | immer |
| 1. Wie häufig wurden Sie von anderen Bewohnern belästigt? | nie | selten | manchmal | häufig |
| 1. Wie häufig haben Sie im Umgang mit den anderen Bewohnern eine gesellige Atmosphäre erlebt? | nie | manchmal | häufig | immer |
| 1. Wie häufig hatten Sie starke Schmerzen? | nie | manchmal | häufig | immer |
| 1. Wie häufig haben Sie sich ängstlich oder angespannt gefühlt? | nie | manchmal | häufig | immer |
| 1. Ich bin zufrieden damit, wie sich mein Leben bisher entwickelt hat. | stimme völlig zu | stimme  eher zu | stimme  eher nicht zu | stimme überhaupt nicht zu |
| 1. Wie häufig haben Sie genügend Aufmerksamkeit erhalten? | nie | manchmal | häufig | immer |
| 1. Wie häufig haben Sie sich ignoriert gefühlt? | nie | selten | manchmal | häufig |
| 1. Wie häufig haben Sie sich zugehörig zu den anderen Bewohnern gefühlt? | nie | manchmal | häufig | immer |
| 1. Wie häufig haben Sie sich unwohl gefühlt? | nie | manchmal | häufig | immer |
| 1. Wie häufig haben Sie sich traurig oder niedergeschlagen gefühlt? | nie | manchmal | häufig | immer |
| 1. Ich denke, mein Leben ist sinnvoll. | stimme völlig zu | stimme  eher zu | stimme  eher nicht zu | stimme überhaupt nicht zu |
| 1. Es gibt Mitbewohner, mit denen ich guten Kontakt habe. | stimme völlig zu | stimme  eher zu | stimme  eher nicht zu | stimme überhaupt nicht zu |
| 1. Wie häufig hatten Sie das Gefühl, dass andere Sie als Belastung wahrgenommen haben? | nie | selten | manchmal | häufig |
| 1. Wie häufig konnten Sie die gemeinsamen Mahlzeiten geniessen? | nie | manchmal | häufig | immer |
| 1. Wie häufig wurden Sie auf angenehme Weise betreut? | nie | manchmal | häufig | immer |
| 1. Wie häufig haben Sie sich leer oder antriebslos gefühlt? | nie | manchmal | häufig | immer |
| 1. Ich habe erreicht, was ich im Leben erreichen wollte. | stimme völlig zu | stimme  eher zu | stimme  eher nicht zu | stimme überhaupt nicht zu |
| 1. Es gibt Pflegekräfte, mit denen ich ein gutes Verhältnis habe. | stimme völlig zu | stimme  eher zu | stimme  eher nicht zu | stimme überhaupt nicht zu |
| 1. Manchmal werde ich geärgert (von anderen schikaniert). | stimme völlig zu | stimme  eher zu | stimme  eher nicht zu | stimme überhaupt nicht zu |
| 1. Wie häufig haben Sie ihre Mahlzeiten genossen? | nie | manchmal | häufig | immer |
| 1. Wie häufig haben Sie sich gelangweilt? | nie | manchmal | häufig | immer |
| 1. Die Menschen, die mir wichtig sind, sehe ich so oft, wie ich möchte. | stimme völlig zu | stimme  eher zu | stimme  eher nicht zu | stimme überhaupt nicht zu |
| 1. Wie häufig litten Sie im Alltag unter körperlichen Einschränkungen oder Schwierigkeiten? | nie | manchmal | häufig | immer |
| 1. Wie häufig haben Sie sich einsam gefühlt? | nie | manchmal | häufig | immer |
| 1. Es gibt Menschen, mit denen ich mich vollkommen wohlfühlen kann. | stimme völlig zu | stimme  eher zu | stimme  eher nicht zu | stimme überhaupt nicht zu |
| 1. Wie häufig machen Sie sich Sorgen um den Sinn ihres Lebens? | nie | selten | manchmal | häufig |

**Antwortkarten**

Im Folgenden finden Sie Antwortkarten zum Ausdrucken und Ausschneiden. Diese sollen bei jeder Lebensqualitätseinschätzung genutzt werden, um den Unterschied zwischen den Antwortpositionen stets deutlich zu machen bzw. zu visualisieren.

✂---------------------------------------------------------------------------------------------------------

| ANTWORT | BESCHREIBUNG |
| --- | --- |
| Nie | Niemals in der letzten Woche |
| Manchmal | 2-3x in der letzten Woche |
| Häufig | 4-5x in der letzten Woche |
| Immer | Täglich in der letzten Woche |

✂---------------------------------------------------------------------------------------------------------

| ANTWORT | BESCHREIBUNG |
| --- | --- |
| Nie | Niemals in der letzten Woche |
| Selten | Höchstens 1x in der letzten Woche |
| Manchmal | 2-3x in der letzten Woche |
| Häufig | 4-5x in der letzten Woche |

✂---------------------------------------------------------------------------------------------------------

✂---------------------------------------------------------------------------------------------------------

| ANTWORT |  |
| --- | --- |
| Stimme völlig zu |  |
| Stimme eher zu |  |
| Stimme eher nicht zu |  |
| Stimme überhaupt nicht zu |  |

✂---------------------------------------------------------------------------------------------------------
